# Supplementary material for: Conserved host–pathogen PPIs Globally conserved inter-species bacterial PPIs based conserved host-pathogen interactome derived novel target inC. pseudotuberculosis,C. diphtheriae,M. tuberculosis,C. ulcerans,Y. pestis, andE. colitargeted byPiper betelcompounds
Source: Royal Society of Chemistry journal article supplement (doi:10.1039/c2ib20206a), 2012-11-14
Supplement: c2ib20206a_2.pdf [file c2ib20206a_2.pdf]

### Supplementary Table-1

List of bacterial species and strains used in this work and there related infections

| SI No | Bacteria and strains                                                         | Causing diseases                                                |
|-------|------------------------------------------------------------------------------|-----------------------------------------------------------------|
| 1     | <i>Escherichia coli</i> O157:H7                                              | Bloody diarrhea                                                 |
| 2     | <i>Escherichia coli</i> K 12 substr. DH10B                                   | Non-pathogenic                                                  |
|       | <i>Escherichia coli</i> K-12 substr. MG1655                                  | Non-pathogenic                                                  |
| 3     | <i>Yersinia pestis</i> CO92                                                  | Plague                                                          |
| 4     | <i>Corynebacterium diphtheriae</i>                                           | Diphtheria                                                      |
| 5     | <i>Corynebacterium urealyticum</i> DSM 7109                                  | Urinary tract infection, Encrusted pyelitis, encrusted cystitis |
| 6     | <i>Corynebacterium glutamicum</i> R                                          | Non-pathogenic                                                  |
| 7     | <i>Corynebacterium glutamicum</i> ATCC 13032<br>Kitasato                     | Non-pathogenic                                                  |
| 8     | <i>Corynebacterium pseudotuberculosis</i> 3/99-5<br>(Isolated from sheep)    | Caseous Lymphadenitis                                           |
| 9     | <i>Corynebacterium pseudotuberculosis</i> FRC41<br>(Isolated from human)     | Caseous Lymphadenitis                                           |
| 10    | <i>Corynebacterium pseudotuberculosis</i> 316<br>(Isolated from horse)       | Caseous Lymphadenitis                                           |
| 11    | <i>Corynebacterium pseudotuberculosis</i> P54B96<br>(Isolated from antelope) | Caseous Lymphadenitis                                           |
| 12    | <i>Mycobacterium tuberculosis</i> H37Rv                                      | Tuberculosis                                                    |
| 13    | <i>Mycobacterium tuberculosis</i> CDC1551                                    | Tuberculosis                                                    |
| 14    | <i>Mycobacterium ulcerans</i> Agy99                                          | Buruli ulcer                                                    |
