# Supplementary material for: Conserved host–pathogen PPIs Globally conserved inter-species bacterial PPIs based conserved host-pathogen interactome derived novel target inC. pseudotuberculosis,C. diphtheriae,M. tuberculosis,C. ulcerans,Y. pestis, andE. colitargeted byPiper betelcompounds
Source: Royal Society of Chemistry journal article supplement (doi:10.1039/c2ib20206a), 2012-11-14
Supplement: c2ib20206a_3.pdf [file c2ib20206a_3.pdf]

Supplementary Table-3

The common conserved inter-species bacterial PPI was made using conserved common 75 *E. coli* proteins and using VisANT tool.

3a)

These 75 proteins interact with other proteins and form a PPI network having 1674 interactions involving 666 interacting nodes (proteins). Total 27 pathways that include both bacterial essential survival and virulence can be mapped. Methods that are behind this PPI are also listed.

| Nodes |          |                |                         |
|-------|----------|----------------|-------------------------|
| Total | Expanded | Pathway Mapped | Expanded/Pathway Mapped |
| 666   | 51       | 27             | 0.5294118               |

| Interactions                                      |      |                      |      |
|---------------------------------------------------|------|----------------------|------|
| Found by 2 method(s)                              | 771  | Found by 3 method(s) | 144  |
| Found by 4 method(s)                              | 5    | Found by 5 method(s) | 1    |
| Found by 6 method(s)                              | 5    | Found by 7 method(s) | 0    |
| Found by 8 method(s)                              | 1    | Total                | 1674 |
| tandem affinity purification                      | 1210 |                      |      |
| chromatography technology                         | 1    |                      |      |
| fluorescence technology                           | 2    |                      |      |
| Biochemical Activity                              | 2    |                      |      |
| protein complementation assay                     | 3    |                      |      |
| gene neighbourhoods                               | 68   |                      |      |
| phylogenetic profile                              | 207  |                      |      |
| domain fusion                                     | 80   |                      |      |
| comigration in non denaturing gel electrophoresis | 2    |                      |      |
| two hybrid test                                   | 2    |                      |      |
| anti tag coimmunoprecipitation                    | 281  |                      |      |
| cosedimentation                                   | 4    |                      |      |
| electron microscopy                               | 2    |                      |      |
| Other Biophysical                                 | 10   |                      |      |
| resonance energy transfer                         | 2    |                      |      |
| inferred by author                                | 755  |                      |      |
| surface plasmon resonance                         | 1    |                      |      |

|                            |    |
|----------------------------|----|
| molecular sieving          | 13 |
| structure based prediction | 19 |
| affinity technology        | 1  |
| cross-linking studies      | 58 |
| coimmunoprecipitation      | 53 |
| x-ray crystallography      | 8  |

### Mapped Pathways

| Pathway ID | Number of Nodes | Pathway ID | Number of Nodes |
|------------|-----------------|------------|-----------------|
| 01120      | 1               | 00520      | 1               |
| 00240      | 1               | 00550      | 1               |
| 00410      | 1               | 00750      | 1               |
| 03018      | 1               | 00190      | 1               |
| 02010      | 5               | 00640      | 1               |
| 01100      | 13              | 00670      | 1               |
| 00500      | 1               | 03010      | 5               |
| 00250      | 1               | 00620      | 2               |
| 03440      | 1               | 00340      | 1               |
| 00680      | 1               | 01110      | 5               |
| 00230      | 1               | 00260      | 1               |
| 00290      | 1               | 00400      | 2               |
| 00430      | 1               | 00770      | 1               |
| 00970      | 2               | 00660      | 1               |

### 3b)

Internal interactions of these 75 proteins form a PPI network having 142 interactions. Total 23 pathways that include both bacterial essential survival and virulence can be mapped. Methods that are behind this PPI are also listed.

### Nodes

| Total | Expanded | Pathway Mapped | Expanded/Pathway Mapped |
|-------|----------|----------------|-------------------------|
| 75    | 75       | 23             | 0.2987013               |

### Interactions

|                      |    |                      |    |
|----------------------|----|----------------------|----|
| Found by 1 method(s) | 1  | Found by 2 method(s) | 32 |
| Found by 3 method(s) | 19 | Found by 4 method(s) | 0  |
| Found by 5 method(s) | 0  | Found by 6 method(s) | 4  |
| Found by 7 method(s) | 0  | Found by 8 method(s) | 0  |

|                                                   |    |       |     |
|---------------------------------------------------|----|-------|-----|
| Found by 9 method(s)                              | 2  | Total | 142 |
| mass spectrometry studies of complexes            | 2  |       |     |
| tandem affinity purification                      | 88 |       |     |
| chromatography technology                         | 2  |       |     |
| Biochemical Activity                              | 2  |       |     |
| protein complementation assay                     | 3  |       |     |
| gene neighbourhoods                               | 17 |       |     |
| phylogenetic profile                              | 22 |       |     |
| domain fusion                                     | 2  |       |     |
| pull down                                         | 2  |       |     |
| comigration in non denaturing gel electrophoresis | 4  |       |     |
| anti tag coimmunoprecipitation                    | 33 |       |     |
| cosedimentation                                   | 4  |       |     |
| Other Biophysical                                 | 3  |       |     |
| electron microscopy                               | 3  |       |     |
| inferred by author                                | 32 |       |     |
| molecular sieving                                 | 6  |       |     |
| structure based prediction                        | 6  |       |     |
| cross-linking studies                             | 18 |       |     |
| coimmunoprecipitation                             | 2  |       |     |
| x-ray crystallography                             | 5  |       |     |
| nuclear magnetic resonance                        | 1  |       |     |

Mapped Pathways

| Pathway ID | Number of Nodes | Pathway ID | Number of Nodes |
|------------|-----------------|------------|-----------------|
| 01120      | 2               | 00520      | 1               |
| 00240      | 2               | 00550      | 1               |
| 00190      | 1               | 02010      | 6               |
| 00640      | 1               | 01100      | 13              |
| 00500      | 1               | 00250      | 1               |
| 02020      | 2               | 00620      | 2               |
| 00340      | 1               | 00680      | 1               |
| 01110      | 5               | 03020      | 1               |
| 00230      | 2               | 00260      | 1               |
| 00290      | 1               | 00400      | 2               |
| 00430      | 1               | 00010      | 1               |
| 00970      | 2               | 00660      | 1               |
