# Supplementary material for: Conserved host–pathogen PPIs Globally conserved inter-species bacterial PPIs based conserved host-pathogen interactome derived novel target inC. pseudotuberculosis,C. diphtheriae,M. tuberculosis,C. ulcerans,Y. pestis, andE. colitargeted byPiper betelcompounds
Source: Royal Society of Chemistry journal article supplement (doi:10.1039/c2ib20206a), 2012-11-14
Supplement: c2ib20206a_4.pdf [file c2ib20206a_4.pdf]

**Supplementary Table-7:** Active residues of four cavities in Acetate kinase (ack) protein.

| <b>Cavity Number</b> | <b>Cavity Volume</b> | <b>Cavity coordinates</b> | <b>Cavity Residues</b>                                                                                                                                                                                                                 |
|----------------------|----------------------|---------------------------|----------------------------------------------------------------------------------------------------------------------------------------------------------------------------------------------------------------------------------------|
| 1(A chain)           | 335.87               | -17.67 36.31 20.10        | Ala109, Arg230, Asn258, Glu254, Gly16, His83, His112, His259, Leu111, Leu219, Pro110, Pro221, Ser17, Ser18, Ser19, Thr220, Val82, Phe168                                                                                               |
| 2(B chain)           | 296.96               | -18.42 -4.09 10.14        | Ala116, Arg80, Arg230, Asn14, Asn113, Asn200, Asn258, Gly16, Gly201, Gly228, His83, His112, Leu111, Met227, Pro114, Pro115, Ser15, Ser17, Ser19, Thr229, Val81, Val82, Val117                                                          |
| 4(B chain)           | 44.03                | -18.77 14.38 24.58        | Ala303, Arg165, Arg296, Asp233, Glu214, Glu223, Gly224, His295, Leu234, Lys299, Thr215, Ser216, Tyr300, Tyr304, Ala147, Ala148, Ala303, Arg165, Arg296, Asp233, Glu214, Glu223, Leu234, Lys299, Ser216, Thr150, Tyr151, Tyr300, Tyr304 |
| 5(B chain)           | 32.25                | -34.83 -3.79 17.27        | Arg165, Arg296, Asp233, Asp235, Glu214, Glu223, Gly224, Leu234, Lys299, Pro236, Ser216, Thr215, Tyr300, Tyr304, Ala303, Arg165, Arg296, Asp233, Asp235, Glu223, Gly224, Leu234, Lys299, Pro236, Ser216, Tyr151, Tyr300                 |
